# Supplementary material for: Effectiveness of CONFIVAC, an intervention to enhance Paediatric Nurses and Paediatricians skills to promote vaccination: a mixed-methods cluster randomised clinical trial
Source: Research Square preprint supplement (doi:10.21203/rs.3.rs-6021302/v1), 2025-02-27
Supplement: Supplementary file 1 [file 7875e1937e60f9b00f3b9e59.docx]

Effectiveness of CONFIVAC, an intervention to enhance Paediatric Nurses and Paediatricians skills to promote vaccination: a mixed-methods cluster randomised clinical trial

Elena Roel, Elisabet Henderson, Sara Valmayor, Victoria Porthé, Alba Asensio, Anna Ramírez Morros, X Bruna, M Isabel Pasarín, Cristina Rius, Elia Díez, CONFIVAC Research Group

***Corresponding author**

Elena Roel Herranz

[eroel@aspb.cat](mailto:eroel@aspb.cat)

Barcelona Public Health Agency. Pl. Lesseps, 1 - 08023 Barcelona, Spain

**Supplementary Materials**

[Supplementary Material 1: Topic Guide for Focus Group Discussions. CONFIVAC, 2024 2](#_Toc190266085)

[Table S1: Characteristics of participants with and without complete follow-up.
 CONFIVAC, 2024. 3](#_Toc190266086)

[Table S2: Self-efficacy handling vaccine hesitancy: questionnaire responses at baseline (T0) and
post-intervention (T1) by study arm. CONFIVAC, 2024. 4](#_Toc190266087)

[Table S3: Vaccine knowledge and beliefs at baseline (T0) and post-intervention (T1)
by study arm. CONFIVAC, 2024. 9](#_Toc190266088)

[Table S4: Organisational changes at baseline (T0) and post-intervention (T1),
 by study arm. CONFIVAC, 2024 14](#_Toc190266089)

[Figure S1. Participant’s evaluation of the training program components. CONFIVAC, 2024. 15](#_Toc190266090)

[Table S5. Process intervention qualitative results: key themes and supporting quotes from participants.
CONFIVAC, 2024 16](#_Toc190266091)

#

## Supplementary Material 1: Topic Guide for Focus Group Discussions. CONFIVAC, 2024

1. **Overall evaluation (10-15’)**

- Why did you decide to enrol in the training? What aspects of the course made it easier for you to sign up and participate?
- What did you like most and least about the training?

1. **Learnings (90’)**
2. **Changes in communication skills and behaviours to address vaccine hesitancy (40’)**

- Have you noticed any changes in the way you communicate or the information you provide to families when addressing vaccination topics? What communication changes have you made to address vaccine hesitancy in consultations? Which changes are more challenging for you?
- One part of the course focused on emotional management. Do you feel that the training has changed the way you manage emotional situations related to vaccine hesitancy in consultations? In what way?

1. **Changes in knowledge about vaccine hesitancy and vaccines (30’)**

- Based on your responses in the survey, everyone has learned different things. What new knowledge have you gained from the training? Which of these are most relevant for your practice? Did any of the information contradict what you previously knew?

1. **Organizational changes in the consultation and at the centre to promote a vaccine-friendly culture (20’)**

- Some of you have been able to implement organizational changes in your consultation, while others have not. Which resources from the course have helped (or which do you think could have helped) you make organizational changes in your consultation or health centre to foster a vaccine-friendly culture?

1. **Ending**

- We're almost finished, but before we close, would you like to add anything else? Do you have any suggestions for improvements or questions we haven't asked yet?

## Table S1: Characteristics of participants with and without complete follow-up. CONFIVAC, 2024.

| **Variable** |  | **Complete follow-up** | **Lost** | **p-value** |
| --- | --- | --- | --- | --- |
| n |  | 135 | 7 |  |
| Group, n (%) | Control | 62 (45.9) | 3 (42.9) | 1.000 |
|  | Intervention | 73 (54.1) | 4 (57.1) |  |
| Age, mean (SD) |  | 45.3 (10.0) | 45.0 (12.7) | 0.934 |
| Gender, n (%) | Female | 126 (93.3) | 6 (85.7) | 0.991 |
|  | Male | 9 (6.7) | 1 (14.3) |  |
| Region, n (%) | Barcelona | 74 (54.8) | 6 (85.7) | 0.224 |
|  | Central Catalonia | 61 (45.2) | 1 (14.3) |  |
| Parenthood, n (%) |  | 103 (76.3) | 4 (57.1) | 0.486 |
| Occupation, n (%) | Physician | 46 (34.1) | 1 (14.3) | 0.501 |
|  | Nurse | 89 (65.9) | 6 (85.7) |  |
| Years of work experience, mean (SD) |  | 19.9 (10.0) | 19.3 (12.5) | 0.875 |
| Encountered a vaccine hesitant family in the prior 4 months, n (%) |  | 123 (91.1) | 6 (85.7) | 1.000 |

Notes: p-values were calculated using Student's t-tests for continuous variables and chi-square tests for categorical variables. Vaccine hesitant families include those who had doubts about vaccines. Abbreviations: SD: standard deviation

## Table S2: Self-efficacy handling vaccine hesitancy: questionnaire responses at baseline (T0) and post-intervention (T1) by study arm. CONFIVAC, 2024.

|  |  | **Control** | | | **Intervention** | | | **Odds Ratio** | |
| --- | --- | --- | --- | --- | --- | --- | --- | --- | --- |
| **Question** | **Response** | **T0**  **n (%)** | **T1**  **n (%)** | **Change**  **(%)** | **T0**  **n (%)** | **T1**  **n (%)** | **Change**  **(%)** | **Baseline-adjusted**  **(95% CI)** | **Fully adjusted**  **(95% CI)** |
| Conveying the importance of vaccination to families | Very capable | 31 (47.7%) | 28 (45.2%) | -2.5 | 46 (60.5%) | 49 (67.1%) | 6.6 | **2.60 (1.19 – 5.85)** | **2.71 (1.20 – 6.30)** |
| Quite capable | 33 (50.8%) | 33 (53.2%) | 2.5 | 27 (35.5%) | 23 (31.5%) | -4.0 | ref | ref |
| Neither capable nor incapable | 1 (1.5%) | 0 (0%) | -1.5 | 3 (3.9%) | 0 (0%) | -3.9 |
| Quite incapable | 0 (0%) | 1 (1.6%) | 1.6 | 0 (0%) | 1 (1.4%) | 1.4 |
| Establishing trust relationships with families regarding vaccination | Very capable | 27 (41.5%) | 26 (41.9%) | 0.4 | 32 (42.1%) | 43 (58.9%) | 16.8 | **2.21 (1.07 – 4.67)** | **2.31 (1.06 – 5.16)** |
| Quite capable | 34 (52.3%) | 34 (54.8%) | 2.5 | 41 (53.9%) | 27 (37.0%) | -17.0 | ref | ref |
| Neither capable nor incapable | 4 (6.2%) | 1 (1.6%) | -4.5 | 3 (3.9%) | 2 (2.7%) | -1.2 |
| Quite incapable | 0 (0%) | 1 (1.6%) | 1.6 | 0 (0%) | 1 (1.4%) | 1.4 |
| Using the social norm as a strategy to recommend vaccination | Very capable | 11 (16.9%) | 10 (16.1%) | -0.8 | 15 (19.7%) | 36 (49.3%) | 29.6 | **5.53 (2.50 – 13.18)** | **5.93 (2.60 – 14.71)** |
| Quite capable | 36 (55.4%) | 29 (46.8%) | -8.6 | 37 (48.7%) | 33 (45.2%) | -3.5 | ref | ref |
| Neither capable nor incapable | 12 (18.5%) | 18 (29.0%) | 10.6 | 16 (21.1%) | 3 (4.1%) | -16.9 |
| Quite incapable | 3 (4.6%) | 1 (1.6%) | -3.0 | 5 (6.6%) | 1 (1.4%) | -5.2 |
| DK/DA | 3 (4.6%) | 4 (6.5%) | 1.8 | 3 (3.9%) | 0 (0%) | -3.9 |
| Identifying families with vaccine hesitancy | Very capable | 22 (33.8%) | 21 (33.9%) | 0.02 | 30 (39.5%) | 35 (47.9%) | 8.5 | 1.89 (0.91 – 3.21) | 1.92 (0.90 – 4.21) |
| Quite capable | 41 (63.1%) | 39 (62.9%) | -0.2 | 40 (52.6%) | 36 (49.3%) | -3.3 | ref | ref |
| Neither capable nor incapable | 2 (3.1%) | 1 (1.6%) | -1.5 | 4 (5.3%) | 2 (2.7%) | -2.5 |
| Quite incapable | 0 (0%) | 0 (0%) | 0 | 1 (1.3%) | 0 (0%) | -1.3 |
| Very incapable | 0 (0%) | 1 (1.6%) | 1.6 | 0 (0%) | 0 (0%) | 0 |
| DK/DA | 0 (0%) | 0 (0%) | 0 | 1 (1.3%) | 0 (0%) | -1.3 |
| Asking about the families' doubts regarding vaccination in a way that makes them feel heard | Very capable | 26 (40.0%) | 20 (32.3%) | -7.7 | 29 (38.2%) | 35 (47.9%) | 9.8 | **2.57 (1.17 – 5.90)** | **2.78 (1.21 – 6.78)** |
| Quite capable | 37 (56.9%) | 36 (58.1%) | 1.1 | 43 (56.6%) | 35 (47.9%) | -8.6 | ref | ref |
| Neither capable nor incapable | 2 (3.1%) | 4 (6.5%) | 3.4 | 4 (5.3%) | 2 (2.7%) | -2.5 |
| Quite incapable | 0 (0%) | 1 (1.6%) | 1.6 | 0 (0%) | 1 (1.4%) | 1.4 |
| Very incapable | 0 (0%) | 1 (1.6%) | 1.6 | 0 (0%) | 0 (0%) | 0 |
| Acknowledge the emotions and concerns expressed by families so they feel heard and supported. | Very capable | 26 (40.0%) | 23 (37.1%) | -2.9 | 28 (36.8%) | 33 (45.2%) | 8.4 | 1.69 (0.82 – 3.55) | 1.72 (0.82 – 3.71) |
| Quite capable | 35 (53.8%) | 33 (53.2%) | -0.6 | 47 (61.8%) | 38 (52.1%) | -9.8 | ref | ref |
| Neither capable nor incapable | 3 (4.6%) | 3 (4.8%) | 0.2 | 1 (1.3%) | 1 (1.4%) | 0.05 |
| Quite incapable | 1 (1.5%) | 1 (1.6%) | 0.07 | 0 (0%) | 1 (1.4%) | 1.4 |
| Very incapable | 0 (0%) | 1 (1.6%) | 1.6 | 0 (0%) | 0 (0%) | 0 |
| DK/DA | 0 (0%) | 1 (1.6%) | 1.6 | 0 (0%) | 0 (0%) | 0 |
| Identifying the main motivation for not vaccinating | Very capable | 8 (12.3%) | 10 (16.1%) | 3.8 | 16 (21.1%) | 23 (31.5%) | 10.5 | 2.25 (0.96 – 5.56) | 2.22 (0.92 – 5.65) |
| Quite capable | 44 (67.7%) | 44 (71.0%) | 3.3 | 51 (67.1%) | 43 (58.9%) | -8.2 | ref | ref |
| Neither capable nor incapable | 9 (13.8%) | 6 (9.7%) | -4.2 | 6 (7.9%) | 7 (9.6%) | 1.7 |
| Quite incapable | 4 (6.2%) | 2 (3.2%) | -2.9 | 2 (2.6%) | 0 (0%) | -2.6 |
| DK/DA | 0 (0%) | 0 (0%) | 0 | 1 (1.3%) | 0 (0%) | -1.3 |
| Adapting the conversation to focus on families' main barrier to vaccination | Very capable | 12 (18.5%) | 8 (12.9%) | -5.6 | 18 (23.7%) | 25 (34.2%) | 10.6 | **3.83 (1.54 – 10.52)** | **3.70 (1.46 – 10.33)** |
| Quite capable | 36 (55.4%) | 37 (59.7%) | 4.3 | 39 (51.3%) | 42 (57.5%) | 6.2 | ref | ref |
| Neither capable nor incapable | 13 (20.0%) | 12 (19.4%) | -0.6 | 12 (15.8%) | 4 (5.5%) | -10.3 |
| Quite incapable | 4 (6.2%) | 3 (4.8%) | -1.3 | 7 (9.2%) | 2 (2.7%) | -6.5 |
| Very incapable | 0 (0%) | 2 (3.2%) | 3.2 | 0 (0%) | 0 (0%) | 0 |
| Responding to families' questions about vaccination | Very capable | 16 (24.6%) | 15 (24.2%) | -0.4 | 23 (30.3%) | 27 (37.0%) | 6.7 | 2.21 (0.94 – 5.42) | 2.33 (0.96 – 5.99) |
| Quite capable | 39 (60.0%) | 37 (59.7%) | -0.3 | 43 (56.6%) | 41 (56.2%) | -0.4 | ref | ref |
| Neither capable nor incapable | 10 (15.4%) | 8 (12.9%) | -2.5 | 8 (10.5%) | 3 (4.1%) | -6.4 |
| Quite incapable | 0 (0%) | 2 (3.2%) | 3.2 | 2 (2.6%) | 1 (1.4%) | -1.3 |
| DK/DA | 0 (0%) | 0 (0%) | 0 | 0 (0%) | 1 (1.4%) | 1.4 |
| Addressing families' concerns regarding vaccination | Very capable | 13 (20.0%) | 13 (21.0%) | 1.0 | 25 (32.9%) | 30 (41.1%) | 8.2 | **2.90 (1.25 – 7.06)** | **2.92 (1.23 – 7.27)** |
| Quite capable | 45 (69.2%) | 39 (62.9%) | -6.3 | 41 (53.9%) | 40 (54.8%) | 0.8 | ref | ref |
| Neither capable nor incapable | 7 (10.8%) | 6 (9.7%) | -1.1 | 8 (10.5%) | 2 (2.7%) | -7.8 |
| Quite incapable | 0 (0%) | 4 (6.5%) | 6.5 | 2 (2.6%) | 1 (1.4%) | -1.3 |
| Addressing the most common myths and misconceptions about vaccination | Very capable | 15 (23.1%) | 14 (22.6%) | -0.5 | 22 (28.9%) | 29 (39.7%) | 10.8 | **2.31 (1.02 – 5.45)** | **2.44 (1.04 – 6.01)** |
| Quite capable | 34 (52.3%) | 34 (54.8%) | 2.5 | 42 (55.3%) | 40 (54.8%) | -0.5 | ref | ref |
| Neither capable nor incapable | 12 (18.5%) | 10 (16.1%) | -2.3 | 8 (10.5%) | 3 (4.1%) | -6.4 |
| Quite incapable | 4 (6.2%) | 4 (6.5%) | 0.3 | 4 (5.3%) | 1 (1.4%) | -3.9 |
| Reaching agreements with families regarding vaccination | Very capable | 14 (21.5%) | 13 (21.0%) | -0.6 | 17 (22.4%) | 37 (50.7%) | 28.3 | **5.07 (2.28 – 11.98)** | **5.24 (2.29 – 12.79)** |
| Quite capable | 45 (69.2%) | 40 (64.5%) | -4.7 | 46 (60.5%) | 31 (42.5%) | -18.1 | ref | ref |
| Neither capable nor incapable | 4 (6.2%) | 7 (11.3%) | 5.1 | 10 (13.2%) | 5 (6.8%) | -6.3 |
| Quite incapable | 2 (3.1%) | 2 (3.2%) | 0.1 | 3 (3.9%) | 0 (0%) | -3.9 |
| Providing families with reliable informational resources | Very capable | 22 (33.8%) | 20 (32.3%) | -1.6 | 25 (32.9%) | 36 (49.3%) | 16.4 | **2.83 (1.24 – 6.86)** | **2.62 (1.13 – 6.45)** |
| Quite capable | 31 (47.7%) | 37 (59.7%) | 12.0 | 43 (56.6%) | 36 (49.3%) | -7.3 | ref | ref |
| Neither capable nor incapable | 9 (13.8%) | 4 (6.5%) | -7.4 | 6 (7.9%) | 0 (0%) | -7.9 |
| Quite incapable | 3 (4.6%) | 1 (1.6%) | -3.0 | 2 (2.6%) | 1 (1.4%) | -1.3 |
| Reinforcing families' autonomy in making vaccination decisions | Very capable | 15 (23.1%) | 14 (22.6%) | -0.5 | 21 (27.6%) | 31 (42.5%) | 14.8 | **2.63 (1.21 – 5.98)** | **2.67 (1.20 – 6.20)** |
| Quite capable | 37 (56.9%) | 39 (62.9%) | 6.0 | 40 (52.6%) | 39 (53.4%) | 0.8 | ref | ref |
| Neither capable nor incapable | 10 (15.4%) | 6 (9.7%) | -5.7 | 14 (18.4%) | 2 (2.7%) | -15.7 |
| Quite incapable | 3 (4.6%) | 3 (4.8%) | 0.2 | 1 (1.3%) | 1 (1.4%) | 0.05 |
| Communicating with families in a way that makes the information easy to understand | Very capable | 20 (30.8%) | 20 (32.3%) | 1.5 | 28 (36.8%) | 32 (43.8%) | 7.0 | 1.98 (0.90 – 4.48) | 2.22 (0.97 – 5.24) |
| Quite capable | 43 (66.2%) | 37 (59.7%) | -6.5 | 40 (52.6%) | 38 (52.1%) | -0.6 | ref | ref |
| Neither capable nor incapable | 2 (3.1%) | 3 (4.8%) | 1.8 | 7 (9.2%) | 2 (2.7%) | -6.5 |
| Quite incapable | 0 (0%) | 1 (1.6%) | 1.6 | 1 (1.3%) | 1 (1.4%) | 0.05 |
| Very incapable | 0 (0%) | 1 (1.6%) | 1.6 | 0 (0%) | 0 (0%) | 0 |
| Communicating with families from diverse cultural backgrounds in a way that they understand | Very capable | 8 (12.3%) | 6 (9.7%) | -2.6 | 9 (11.8%) | 22 (30.1%) | 18.3 | **5.42 (2.07 – 16.50)** | **5.64 (2.09 – 17.70)** |
| Quite capable | 43 (66.2%) | 40 (64.5%) | -1.6 | 46 (60.5%) | 40 (54.8%) | -5.7 | ref | ref |
| Neither capable nor incapable | 13 (20.0%) | 11 (17.7%) | -2.3 | 13 (17.1%) | 10 (13.7%) | -3.4 |
| Quite incapable | 1 (1.5%) | 4 (6.5%) | 4.9 | 8 (10.5%) | 1 (1.4%) | -9.2 |
| Very incapable | 0 (0%) | 1 (1.6%) | 1.6 | 0 (0%) | 0 (0%) | 0 |
| Managing the emotions triggered when dealing with families with vaccine hesitancy | Very capable | 9 (13.8%) | 7 (11.3%) | -2.6 | 14 (18.4%) | 20 (27.4%) | 9.0 | **3.39 (1.32 – 9.66)** | **3.43 (1.30 – 10.17)** |
| Quite capable | 37 (56.9%) | 39 (62.9%) | 6.0 | 36 (47.4%) | 39 (53.4%) | 6.1 | ref | ref |
| Neither capable nor incapable | 11 (16.9%) | 10 (16.1%) | -0.8 | 16 (21.1%) | 11 (15.1%) | -6.0 |
| Quite incapable | 8 (12.3%) | 5 (8.1%) | -4.2 | 9 (11.8%) | 3 (4.1%) | -7.7 |
| Very incapable | 0 (0%) | 1 (1.6%) | 1.6 | 1 (1.3%) | 0 (0%) | -1.3 |

Notes: T0 responses are reported for all study participants (N=141), while T1 responses are reported only for those with complete follow-up (n=135). All models were estimated by intention to treat. Fully adjusted models were adjusted by baseline responses, gender, occupation, region, years of work experience, and parenthood. Abbreviations: CI: confidence interval; DK/DA: don’t know/don’t answer; ref: reference.

## Table S3: Vaccine knowledge and beliefs at baseline (T0) and post-intervention (T1) by study arm. CONFIVAC, 2024.

|  |  | **Control** | | | **Intervention** | | | **Odds Ratio** | |
| --- | --- | --- | --- | --- | --- | --- | --- | --- | --- |
| **Question** | **Response** | **T0**  **n (%)** | **T1**  **n (%)** | **Change**  **(%)** | **T0**  **n (%)** | **T1**  **n (%)** | **Change**  **(%)** | **Baseline-adjusted**  **(95% CI)** | **Fully adjusted**  **(95% CI)** |
| Children should only be vaccinated for serious illnesses | Completely disagree | 32 (49.2%) | 28 (45.2%) | -4.1 | 45 (59.2%) | 43 (58.9%) | -0.3 | 1.78 (0.87 – 3.67) | 1.87 (0.90 – 3.94) |
| Disagree | 23 (35.4%) | 21 (33.9%) | -1.5 | 22 (28.9%) | 22 (30.1%) | 1.2 | ref | ref |
| NAND | 2 (3.1%) | 1 (1.6%) | -1.5 | 3 (3.9%) | 1 (1.4%) | -2.6 |
| Agree | 2 (3.1%) | 5 (8.1%) | 5.0 | 1 (1.3%) | 1 (1.4%) | 0.05 |
| Completely agree | 5 (7.7%) | 6 (9.7%) | 2.0 | 4 (5.3%) | 6 (8.2%) | 3.0 |
| DK/DA | 1 (1.5%) | 1 (1.6%) | 0.07 | 1 (1.3%) | 0 (0%) | -1.3 |
| Children receive more vaccines than they need | Completely disagree | 39 (60.0%) | 38 (61.3%) | 1.3 | 50 (65.8%) | 55 (75.3%) | 9.6 | 1.73 (0.75 – 4.05) | 1.75 (0.75 – 4.19) |
| Disagree | 19 (29.2%) | 20 (32.3%) | 3.0 | 16 (21.1%) | 17 (23.3%) | 2.2 | ref | ref |
| NAND | 6 (9.2%) | 1 (1.6%) | -7.6 | 7 (9.2%) | 1 (1.4%) | -7.8 |
| Agree | 1 (1.5%) | 2 (3.2%) | 1.7 | 3 (3.9%) | 0 (0%) | -3.9 |
| Completely agree | 0 (0%) | 1 (1.6%) | 1.6 | 0 (0%) | 0 (0%) | 0 |
| I am more likely to trust vaccines that have been around longer, compared with newer vaccines | Completely disagree | 14 (21.5%) | 15 (24.2%) | 2.7 | 23 (30.3%) | 24 (32.9%) | 2.6 | 1.44 (0.61 – 3.44) | 1.16 (0.46 – 2.90) |
| Disagree | 25 (38.5%) | 22 (35.5%) | -3.0 | 26 (34.2%) | 30 (41.1%) | 6.9 | ref | ref |
| NAND | 11 (16.9%) | 11 (17.7%) | 0.8 | 10 (13.2%) | 11 (15.1%) | 1.9 |
| Agree | 13 (20.0%) | 14 (22.6%) | 2.6 | 14 (18.4%) | 6 (8.2%) | -10.2 |
| Completely agree | 2 (3.1%) | 0 (0%) | -3.1 | 2 (2.6%) | 2 (2.7%) | 0.1 |
| DK/DA | 0 (0%) | 0 (0%) | 0 | 1 (1.3%) | 0 (0%) | -1.3 |
| Vaccines are one of the safest sanitary measures that exist | Completely disagree | 0 (0%) | 2 (3.2%) | 3.2 | 5 (6.6%) | 1 (1.4%) | -5.2 | ref | ref |
| Disagree | 1 (1.5%) | 0 (0%) | -1.5 | 0 (0%) | 0 (0%) | 0 |
| NAND | 3 (4.6%) | 2 (3.2%) | -1.4 | 3 (3.9%) | 1 (1.4%) | -2.6 |
| Agree | 10 (15.4%) | 14 (22.6%) | 7.2 | 16 (21.1%) | 7 (9.6%) | -11.5 |
| Completely agree | 51 (78.5%) | 44 (71.0%) | -7.5 | 52 (68.4%) | 64 (87.7%) | 19.3 | **8.65 (2.71 – 35.60)** | **8.92 (2.76 – 37.11)** |
| Thanks to scientific research, vaccines are increasingly better and effective | Completely disagree | 0 (0%) | 2 (3.2%) | 3.2 | 7 (9.2%) | 1 (1.4%) | -7.8 | ref | ref |
| Disagree | 0 (0%) | 1 (1.6%) | 1.6 | 0 (0%) | 0 (0%) | 0 |
| NAND | 3 (4.6%) | 2 (3.2%) | -1.4 | 2 (2.6%) | 2 (2.7%) | 0.1 |
| Agree | 11 (16.9%) | 12 (19.4%) | 2.4 | 20 (26.3%) | 11 (15.1%) | -11.2 |
| Completely agree | 51 (78.5%) | 45 (72.6%) | -5.9 | 47 (61.8%) | 59 (80.8%) | 19.0 | 2.04 (0.84 – 5.17) | 1.98 (0.79 – 5.15) |
| It is better for children to develop immunity by having the illness than through vaccination | Completely disagree | 32 (49.2%) | 30 (48.4%) | -0.8 | 41 (53.9%) | 46 (63.0%) | 9.1 | 2.09 (0.97 – 4.59) | 2.00 (0.90 – 4.53) |
| Disagree | 27 (41.5%) | 21 (33.9%) | -7.7 | 23 (30.3%) | 22 (30.1%) | -0.1 | ref | ref |
| NAND | 6 (9.2%) | 9 (14.5%) | 5.3 | 10 (13.2%) | 4 (5.5%) | -7.7 |
| Agree | 0 (0%) | 2 (3.2%) | 3.2 | 0 (0%) | 0 (0%) | 0 |
| Completely agree | 0 (0%) | 0 (0%) | 0 | 2 (2.6%) | 1 (1.4%) | -1.3 |
| Continuing to vaccinate children against polio in Spain is acceptable, even though it has been eliminated from the country | Completely disagree | 2 (3.1%) | 2 (3.2%) | 0.1 | 1 (1.3%) | 1 (1.4%) | 0.05 | ref | ref |
| Disagree | 0 (0%) | 0 (0%) | 0 | 0 (0%) | 1 (1.4%) | 1.4 |
| NAND | 3 (4.6%) | 1 (1.6%) | -3.0 | 3 (3.9%) | 1 (1.4%) | -2.6 |
| Agree | 15 (23.1%) | 12 (19.4%) | -3.7 | 19 (25.0%) | 9 (12.3%) | -12.7 |
| Completely agree | 45 (69.2%) | 47 (75.8%) | 6.6 | 53 (69.7%) | 61 (83.6%) | 13.8 | 2.21 (0.88 – 5.84) | 2.24 (0.83 – 6.33) |
| I believe that at least one of the vaccines in the current vaccination calendar is administered too early | Completely disagree | 29 (44.6%) | 37 (59.7%) | 15.1 | 29 (38.2%) | 42 (57.5%) | 19.4 | 1.15 (0.52 – 2.57) | 1.17 (0.50 – 2.75) |
| Disagree | 22 (33.8%) | 18 (29.0%) | -4.8 | 27 (35.5%) | 19 (26.0%) | -9.5 | ref | ref |
| NAND | 7 (10.8%) | 2 (3.2%) | -7.5 | 12 (15.8%) | 10 (13.7%) | -2.1 |
| Agree | 3 (4.6%) | 4 (6.5%) | 1.8 | 4 (5.3%) | 2 (2.7%) | -2.5 |
| Completely agree | 2 (3.1%) | 0 (0%) | -3.1 | 2 (2.6%) | 0 (0%) | -2.6 |
| DK/DA | 2 (3.1%) | 1 (1.6%) | -1.5 | 2 (2.6%) | 0 (0%) | -2.6 |
| There are groups with economic, ideological, and political interests that spread fake information regarding vaccination on the internet and social media | DK/DA | 3 (4.6%) | 0 (0%) | -4.6 | 0 (0%) | 3 (4.1%) | 4.1 | ref | ref |
| Completely disagree | 5 (7.7%) | 4 (6.5%) | -1.2 | 3 (3.9%) | 1 (1.4%) | -2.6 |
| Disagree | 3 (4.6%) | 3 (4.8%) | 0.2 | 2 (2.6%) | 6 (8.2%) | 5.6 |
| NAND | 2 (3.1%) | 6 (9.7%) | 6.6 | 14 (18.4%) | 1 (1.4%) | -17.1 |
| Agree | 26 (40.0%) | 29 (46.8%) | 6.8 | 31 (40.8%) | 24 (32.9%) | -7.9 |
| Completely agree | 26 (40.0%) | 20 (32.3%) | -7.7 | 26 (34.2%) | 38 (52.1%) | 17.8 | **2.72 (1.24 – 6.24)** | **3.06 (1.34 – 7.35)** |
| The MMR vaccine can be a cause of autism | Completely disagree | 52 (80.0%) | 48 (77.4%) | -2.6 | 53 (69.7%) | 69 (94.5%) | 24.8 | **12.83 (3.08 – 75.67)** | **13.10 (2.98 – 83.29)** |
| Disagree | 10 (15.4%) | 12 (19.4%) | 4.0 | 20 (26.3%) | 4 (5.5%) | -20.8 | ref | ref |
| NAND | 3 (4.6%) | 1 (1.6%) | -3.0 | 0 (0%) | 0 (0%) | 0 |
| Completely agree | 0 (0%) | 0 (0%) | 0 | 1 (1.3%) | 0 (0%) | -1.3 |
| DK/DA | 0 (0%) | 1 (1.6%) | 1.6 | 2 (2.6%) | 0 (0%) | -2.6 |
| The varicella vaccine can be a cause of attenuated varicella | DK/DA | 2 (3.1%) | 1 (1.6%) | -1.5 | 2 (2.6%) | 0 (0%) | -2.6 | ref | ref |
| Completely disagree | 10 (15.4%) | 13 (21.0%) | 5.6 | 15 (19.7%) | 15 (20.5%) | 0.8 |
| Disagree | 16 (24.6%) | 9 (14.5%) | -10.1 | 14 (18.4%) | 20 (27.4%) | 9.0 |
| NAND | 3 (4.6%) | 4 (6.5%) | 1.8 | 10 (13.2%) | 7 (9.6%) | -3.6 |
| Agree | 25 (38.5%) | 28 (45.2%) | 6.7 | 27 (35.5%) | 18 (24.7%) | -10.9 |
| Completely agree | 9 (13.8%) | 7 (11.3%) | -2.6 | 8 (10.5%) | 13 (17.8%) | 7.3 | 3.28 (0.98 – 13.18) | 3.95 (1.07 – 17.36) |
| It is necessary to vaccinate healthy children between 6 and 59 months against the flu | DK/DA | 0 (0%) | 0 (0%) | 0 | 0 (0%) | 1 (1.4%) | 1.4 | ref | ref |
| Completely disagree | 0 (0%) | 2 (3.2%) | 3.2 | 3 (3.9%) | 0 (0%) | -3.9 |
| Disagree | 2 (3.1%) | 2 (3.2%) | 0.1 | 5 (6.6%) | 0 (0%) | -6.6 |
| NAND | 15 (23.1%) | 11 (17.7%) | -5.3 | 12 (15.8%) | 3 (4.1%) | -11.7 |
| Agree | 21 (32.3%) | 18 (29.0%) | -3.3 | 30 (39.5%) | 22 (30.1%) | -9.3 |
| Completely agree | 27 (41.5%) | 29 (46.8%) | 5.2 | 26 (34.2%) | 47 (64.4%) | 30.2 | **2.85 (1.20 – 7.18)** | **2.94 (1.20 – 7.69)** |
| At least one vaccination in the vaccination calendar contains thimerosal | Completely disagree | 19 (29.2%) | 24 (38.7%) | 9.5 | 14 (18.4%) | 33 (45.2%) | 26.8 | 1.57 (0.74 – 3.42) | 1.64 (0.75 – 3.67) |
| Disagree | 5 (7.7%) | 9 (14.5%) | 6.8 | 13 (17.1%) | 7 (9.6%) | -7.5 | ref | ref |
| NAND | 5 (7.7%) | 5 (8.1%) | 0.4 | 5 (6.6%) | 6 (8.2%) | 1.6 |
| Agree | 11 (16.9%) | 10 (16.1%) | -0.8 | 19 (25.0%) | 12 (16.4%) | -8.6 |
| Completely agree | 5 (7.7%) | 5 (8.1%) | 0.4 | 4 (5.3%) | 7 (9.6%) | 4.3 |
| DK/DA | 20 (30.8%) | 9 (14.5%) | -16.3 | 21 (27.6%) | 8 (11.0%) | -16.7 |
| The amount of thimerosal in vaccines can cause neurotoxicity | Completely disagree | 15 (23.1%) | 25 (40.3%) | 17.2 | 26 (34.2%) | 45 (61.6%) | 27.4 | **2.77 (1.26 – 6.28)** | **3.59 (1.54 – 8.89)** |
| Disagree | 19 (29.2%) | 17 (27.4%) | -1.8 | 16 (21.1%) | 18 (24.7%) | 3.6 | ref | ref |
| NAND | 8 (12.3%) | 8 (12.9%) | 0.6 | 9 (11.8%) | 1 (1.4%) | -10.5 |
| Agree | 2 (3.1%) | 4 (6.5%) | 3.4 | 6 (7.9%) | 1 (1.4%) | -6.5 |
| Completely agree | 2 (3.1%) | 1 (1.6%) | -1.5 | 1 (1.3%) | 0 (0%) | -1.3 |
| DK/DA | 19 (29.2%) | 7 (11.3%) | -17.9 | 18 (23.7%) | 8 (11.0%) | -12.7 |
| At least one vaccination in the vaccination calendar contains aluminium | DK/DA | 15 (23.1%) | 5 (8.1%) | -15.0 | 12 (15.8%) | 2 (2.7%) | -13.0 | ref | ref |
| Completely disagree | 12 (18.5%) | 9 (14.5%) | -3.9 | 4 (5.3%) | 18 (24.7%) | 19.4 |
| Disagree | 5 (7.7%) | 4 (6.5%) | -1.2 | 7 (9.2%) | 6 (8.2%) | -1.0 |
| NAND | 4 (6.2%) | 4 (6.5%) | 0.3 | 6 (7.9%) | 4 (5.5%) | -2.4 |
| Agree | 18 (27.7%) | 23 (37.1%) | 9.4 | 28 (36.8%) | 24 (32.9%) | -4.0 |
| Completely agree | 11 (16.9%) | 17 (27.4%) | 10.5 | 19 (25.0%) | 19 (26.0%) | 1.0 | 0.66 (0.26 – 1.60) | 0.62 (0.24 – 1.54) |
| The amount of aluminium in vaccines can cause neurotoxicity | Completely disagree | 22 (33.8%) | 32 (51.6%) | 17.8 | 31 (40.8%) | 49 (67.1%) | 26.3 | 1.80 (0.85 – 3.87) | 1.80 (0.83 – 3.98) |
| Disagree | 20 (30.8%) | 14 (22.6%) | -8.2 | 23 (30.3%) | 20 (27.4%) | -2.9 | ref | ref |
| NAND | 7 (10.8%) | 6 (9.7%) | -1.1 | 9 (11.8%) | 1 (1.4%) | -10.5 |
| Agree | 1 (1.5%) | 3 (4.8%) | 3.3 | 3 (3.9%) | 0 (0%) | -3.9 |
| Completely agree | 1 (1.5%) | 1 (1.6%) | 0.07 | 2 (2.6%) | 0 (0%) | -2.6 |
| DK/DA | 14 (21.5%) | 6 (9.7%) | -11.9 | 8 (10.5%) | 3 (4.1%) | -6.4 |
| Having an egg allergy is a contraindication for the MMR vaccine | Completely disagree | 35 (53.8%) | 38 (61.3%) | 7.4 | 45 (59.2%) | 51 (69.9%) | 10.7 | 1.51 (0.68 – 3.35) | 1.53 (0.68 – 3.50) |
| Disagree | 27 (41.5%) | 23 (37.1%) | -4.4 | 26 (34.2%) | 19 (26.0%) | -8.2 | ref | ref |
| NAND | 0 (0%) | 0 (0%) | 0 | 1 (1.3%) | 2 (2.7%) | 1.4 |
| Agree | 1 (1.5%) | 1 (1.6%) | 0.07 | 1 (1.3%) | 0 (0%) | -1.3 |
| Completely agree | 1 (1.5%) | 0 (0%) | -1.5 | 1 (1.3%) | 0 (0%) | -1.3 |
| DK/DA | 1 (1.5%) | 0 (0%) | -1.5 | 2 (2.6%) | 1 (1.4%) | -1.3 |

Notes: T0 responses are reported for all study participants (N=141), while T1 responses are reported only for those with complete follow-up (n=135). All models were estimated by intention to treat. Fully adjusted models were adjusted by baseline responses, gender, occupation, region, years of work experience, and parenthood. Abbreviations: CI: confidence interval; DK/DA: don’t know/don’t answer; MMR: measles, mumps and rubella; NAND: neither agree nor disagree; ref: reference.

## Table S4: Organisational changes at baseline (T0) and post-intervention (T1), by study arm. CONFIVAC, 2024

|  |  | **Control** | | | **Intervention** | | | **Odds Ratio** | |
| --- | --- | --- | --- | --- | --- | --- | --- | --- | --- |
| **Question** | **Response** | **T0**  **n (%)** | **T1**  **n (%)** | **Change**  **(%)** | **T0**  **n (%)** | **T1**  **n (%)** | **Change**  **(%)** | **Baseline-adjusted**  **(95% CI)** | **Fully adjusted**  **(95% CI)** |
| Have you used any organizational tools in your practice to increase vaccination coverage in the last 4 months? | Yes | 37 (56.9%) | 37 (59.7%) | 2.8 | 46 (60.5%) | 55 (75.3%) | 14.8 | 1.90 (0.91 – 4.02) | 1.88 (0.88 – 4.09) |
| I intend to | 3 (4.6%) | 5 (8.1%) | 3.4 | 6 (7.9%) | 6 (8.2%) | 0.3 | ref | ref |
| No | 25 (38.5%) | 20 (32.3%) | -6.2 | 24 (31.6%) | 12 (16.4%) | -15.1 |
| Have you been part of any organizational changes to increase vaccination coverage at your workplace in the last 4 months? | Yes | 30 (46.2%) | 30 (48.4%) | 2.2 | 37 (48.7%) | 43 (58.9%) | 10.2 | 1.43 (0.70 – 2.94) | 1.41 (0.67 – 2.98) |
| I intend to | 1 (1.5%) | 4 (6.5%) | 4.9 | 5 (6.6%) | 8 (11.0%) | 4.4 | ref | ref |
| No | 34 (52.3%) | 28 (45.2%) | -7.1 | 34 (44.7%) | 22 (30.1%) | -14.6 |

Notes: T0 responses are reported for all study participants (N=141), while T1 responses are reported only for those with complete follow-up (n=135). All models were estimated by intention to treat. Fully adjusted models were adjusted by baseline responses, gender, occupation, region, years of work experience, and parenthood. Abbreviations: CI: confidence interval; ref: reference.

## Figure S1. Participant’s evaluation of the training program components. CONFIVAC, 2024.


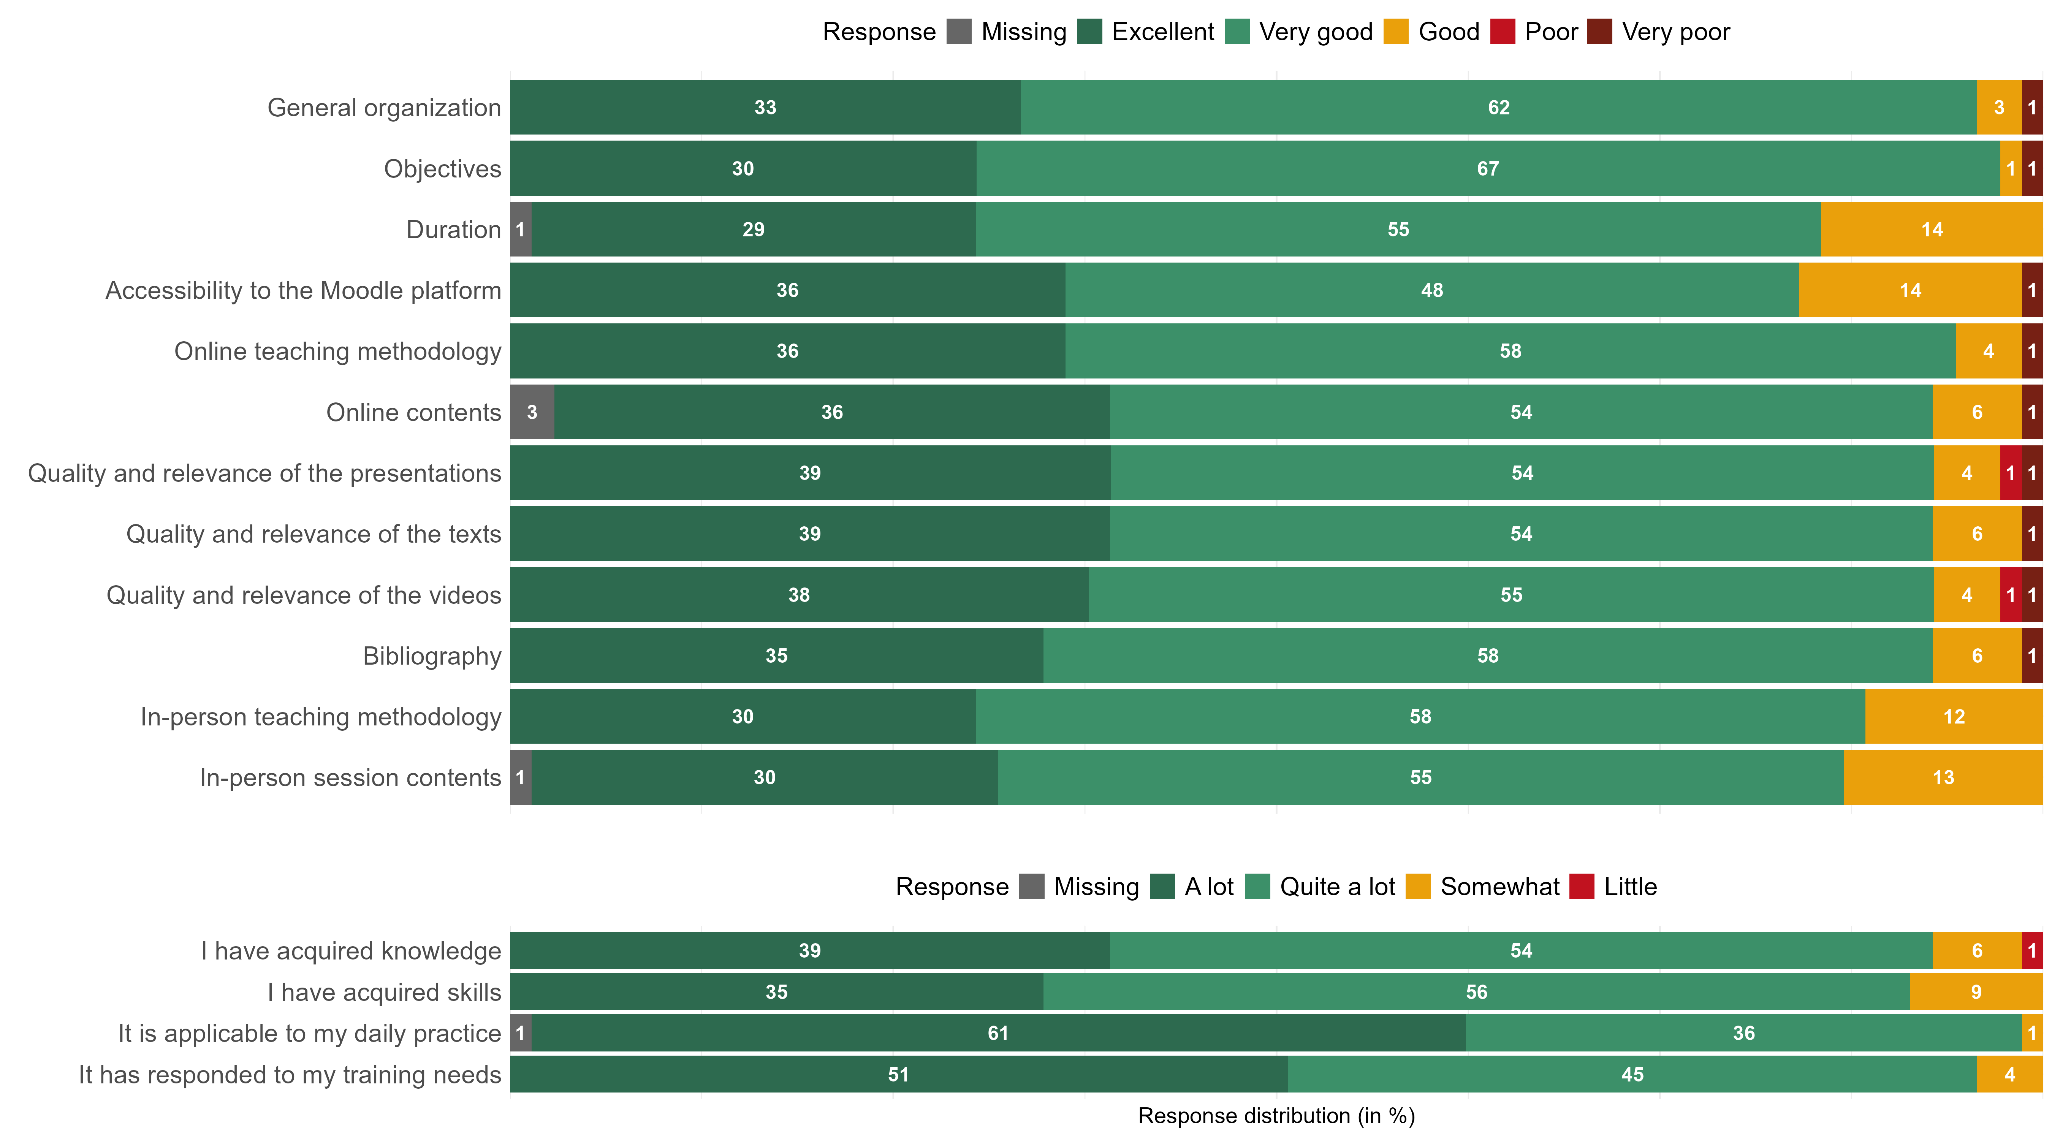


## Table S5. Process intervention qualitative results: key themes and supporting quotes from participants. CONFIVAC, 2024

| **Main categories and subcategories** | **Quotes** |
| --- | --- |
| The course is useful | *All the tools the course offered seemed very useful to me. [P6]*  *At the in-person session, there were (...) four cases, and they were the four most typical cases we’ve all encountered. (...) You think, it’s worth doing it, isn’t it? Because it’s useful, practical for applying it in the consultation. [N5]* |
| Materials are clear and easy to follow | *The content was very easy to read; in fact, I printed it out, and from time to time, I refresh myself with it. [N7]*  *Overall, I’d say it’s well done; I found it enjoyable, easy to do, and practical. [P4]*  *I really liked the online videos. The videos were very well-exemplified because you can empathize a lot since it’s what we might encounter in daily consultations. [N7]* |
| Hybrid learning is valued | *A course with this format, both online and in-person, is perfect because I’ve done many online ones, but maybe we had to consolidate points together. [G2inf7]*  *I think we can all agree that courses that are only in-person are more cumbersome (...), but also, courses that are only online, I think, lose a lot, you learn much less, and they are not as positive. [N12]* |
| Online learning facilitates enrolment and completion | *The fact that it was online was wonderful because, of course, (...) having to travel is always a problem, so the fact that it was online is fantastic. [N10]*  *The online format seemed wonderful to me given the little time we have nowadays. [G1inf3]* |
| Practice reinforces learning | *The roleplaying we did during the in-person session, where we could rehearse and such, seemed super interesting to me, and I think it helped me become aware of this issue. [N12]*  *I would add the role-play I did in person. (...) The colleague I worked with really made me think about the real situation as if I were living it, and it was very helpful to me. [N11]* |
| Value of sharing practices with peers | *Sharing with more colleagues their way of doing things shows you that your way is not unique. [N9]*  *You discover that there are more ways, and many of them can later become a tool for you. So, the fact of meeting and talking about our methods, I really liked it, honestly. [N2]* |
| Suggestions for improvement | *I would have also liked to, apart from doing it in pairs, be able to do it more at a generalized level (...) That is, the actions of the colleagues, seeing the responses of other colleagues, depending on who you pair up with, you might feel more limited, and act based on what you already have with your partner. If it had been more generalized, you could, you know, correct on the go; it could have been more beneficial. [N14]*  *The section about implementing organizational changes, well, I don’t know, maybe making it a little more protocolized, I don’t know how to say it. Making it much easier to make these changes. [N14]* |
